# Supplementary material for: Effects of simulated secondary organic aerosol water on PM 1 levels and composition over the US
Source: Copernicus journal article supplement (doi:10.5194/acp-23-13555-2023), 2023-10-30
Supplement: Supplementary file 1 [file acp-23-13555-2023-supplement.pdf]

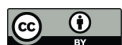

*Supplement of*

## **Effects of simulated secondary organic aerosol water on PM<sub>1</sub> levels and composition over the US**

**Stylianos Kakavas et al.**

*Correspondence to:* Spyros N. Pandis ([spyros@chemeng.upatras.gr](mailto:spyros@chemeng.upatras.gr)) and Athanasios Nenes ([athanasios.nenes@epfl.ch](mailto:athanasios.nenes@epfl.ch))

The copyright of individual parts of the supplement might differ from the article licence.

**Table S1:** Characteristics of the four selected sites

| Site                   | SOA levels ( $\mu\text{g m}^{-3}$ ) | Ammonium levels ( $\mu\text{g m}^{-3}$ ) | Nitrate levels ( $\mu\text{g m}^{-3}$ ) | Sulfate levels ( $\mu\text{g m}^{-3}$ ) | RH levels (%) | Location in CONUS |
|------------------------|-------------------------------------|------------------------------------------|-----------------------------------------|-----------------------------------------|---------------|-------------------|
| Sacramento, California | 1                                   | 0.7                                      | 0.5                                     | 1                                       | 61            | West              |
| Houston, Texas         | 2.5                                 | 1.2                                      | 0.7                                     | 1.8                                     | 75            | South             |
| Atlanta, Georgia       | 4                                   | 1.2                                      | 0.7                                     | 1.7                                     | 69            | South             |
| Toronto, Canada        | 2.5                                 | 1.2                                      | 1.2                                     | 1.6                                     | 73            | North             |

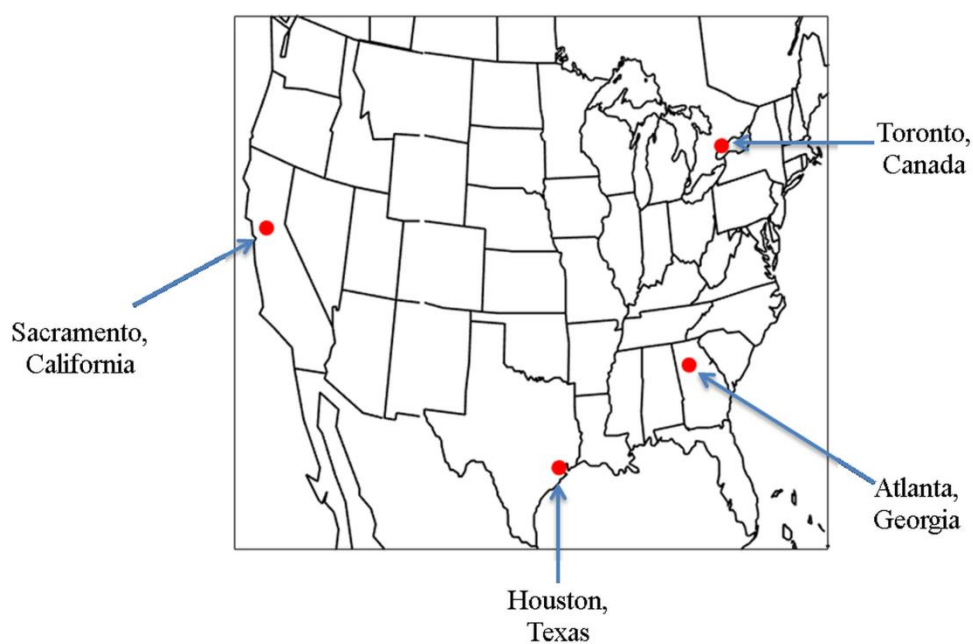

**Figure S1.** PMCAMx modeling domain and position of the four examined sites.

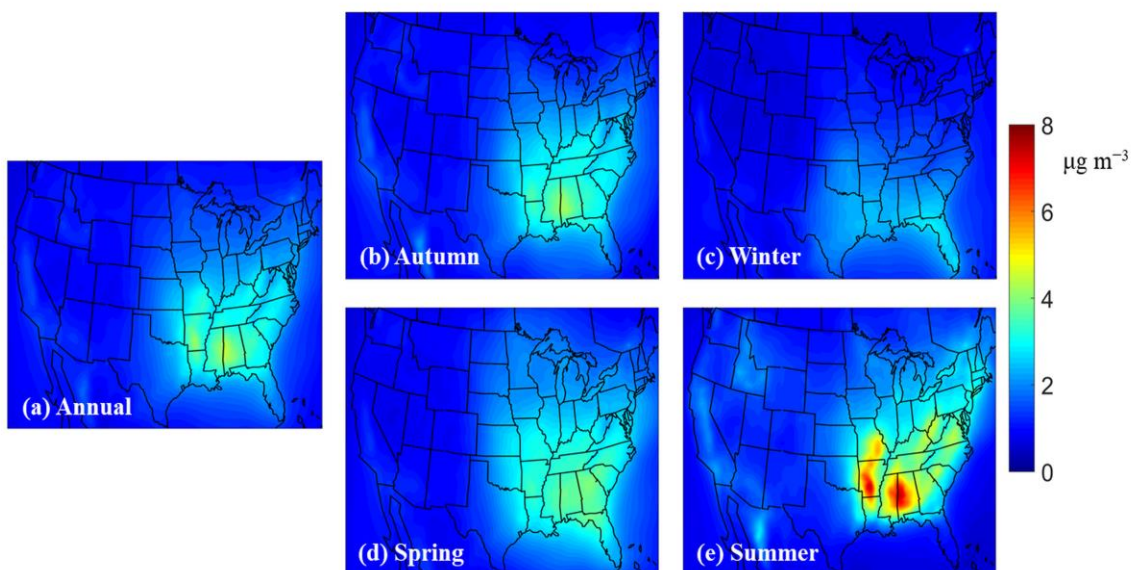

**Figure S2.** Average ground-level concentrations (in  $\mu\text{g m}^{-3}$ ) of PM<sub>1</sub> SOA: **(a)** annual, **(b)** during autumn (SON), **(c)** during winter (DJF), **(d)** during spring (MAM), and **(e)** during summer (JJA) of 2010.

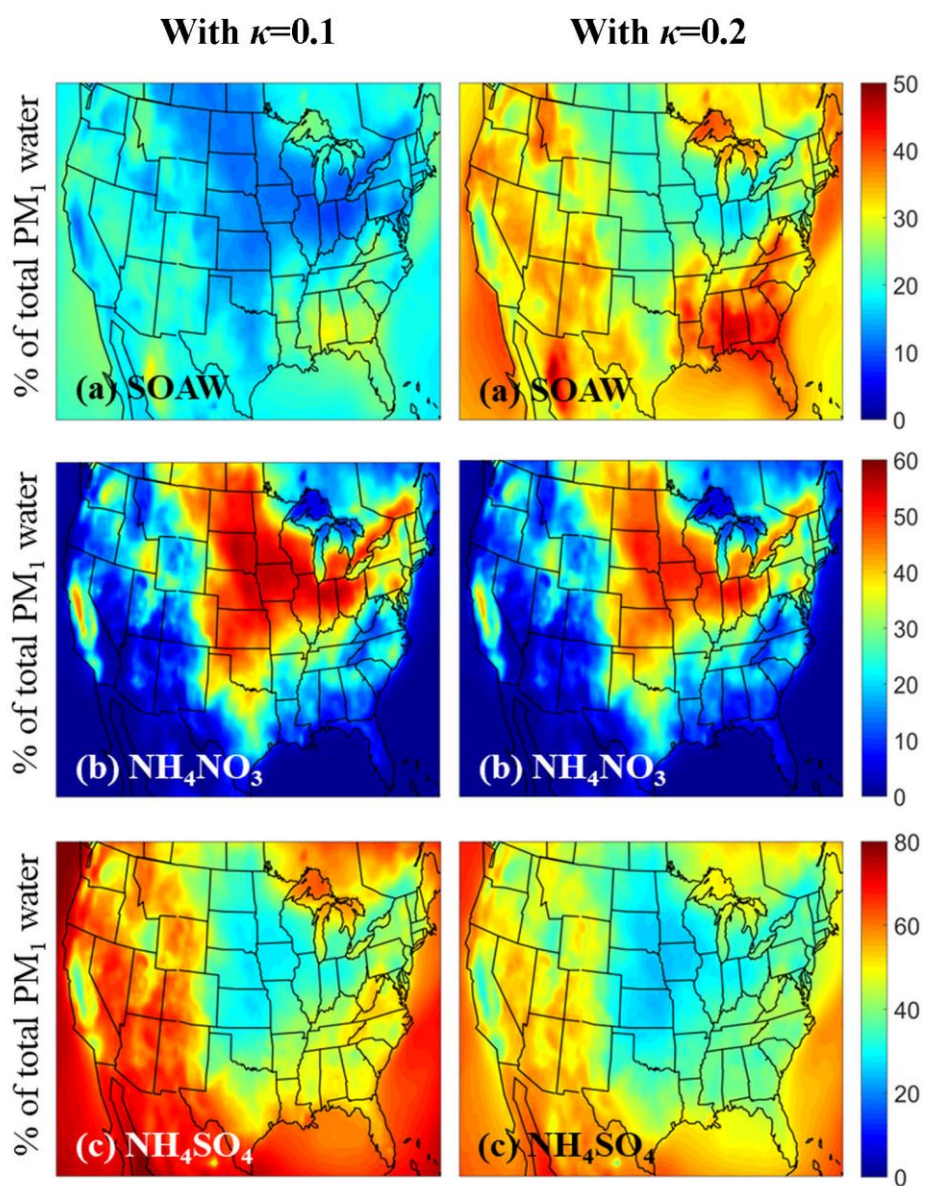

**Figure S3.** Annual average contribution to total  $PM_{10}$  water concentrations from: (a) SOAW, (b) ammonium nitrate water, and (c) ammonium sulfate water when SOAW is present in the simulations with  $\kappa=0.1$  and with  $\kappa=0.2$  during 2010.

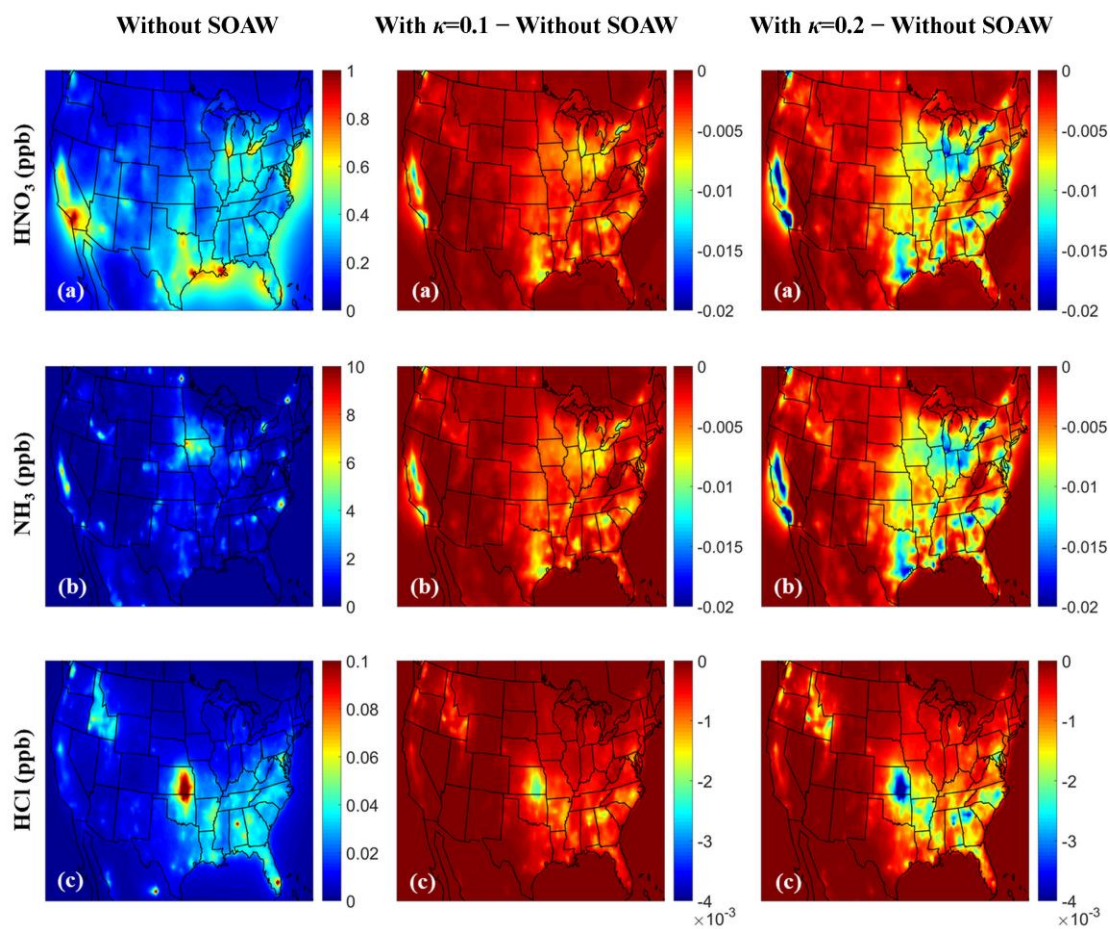

**Figure S4.** Annual average ground-level concentrations (in ppb) of gas phase: (a) nitric acid, (b) ammonia, and (c) hydrochloric acid neglecting SOAW and the annual concentration changes when SOAW is present in the simulations with  $\kappa=0.1$  and  $\kappa=0.2$ . A negative change corresponds to a decrease.



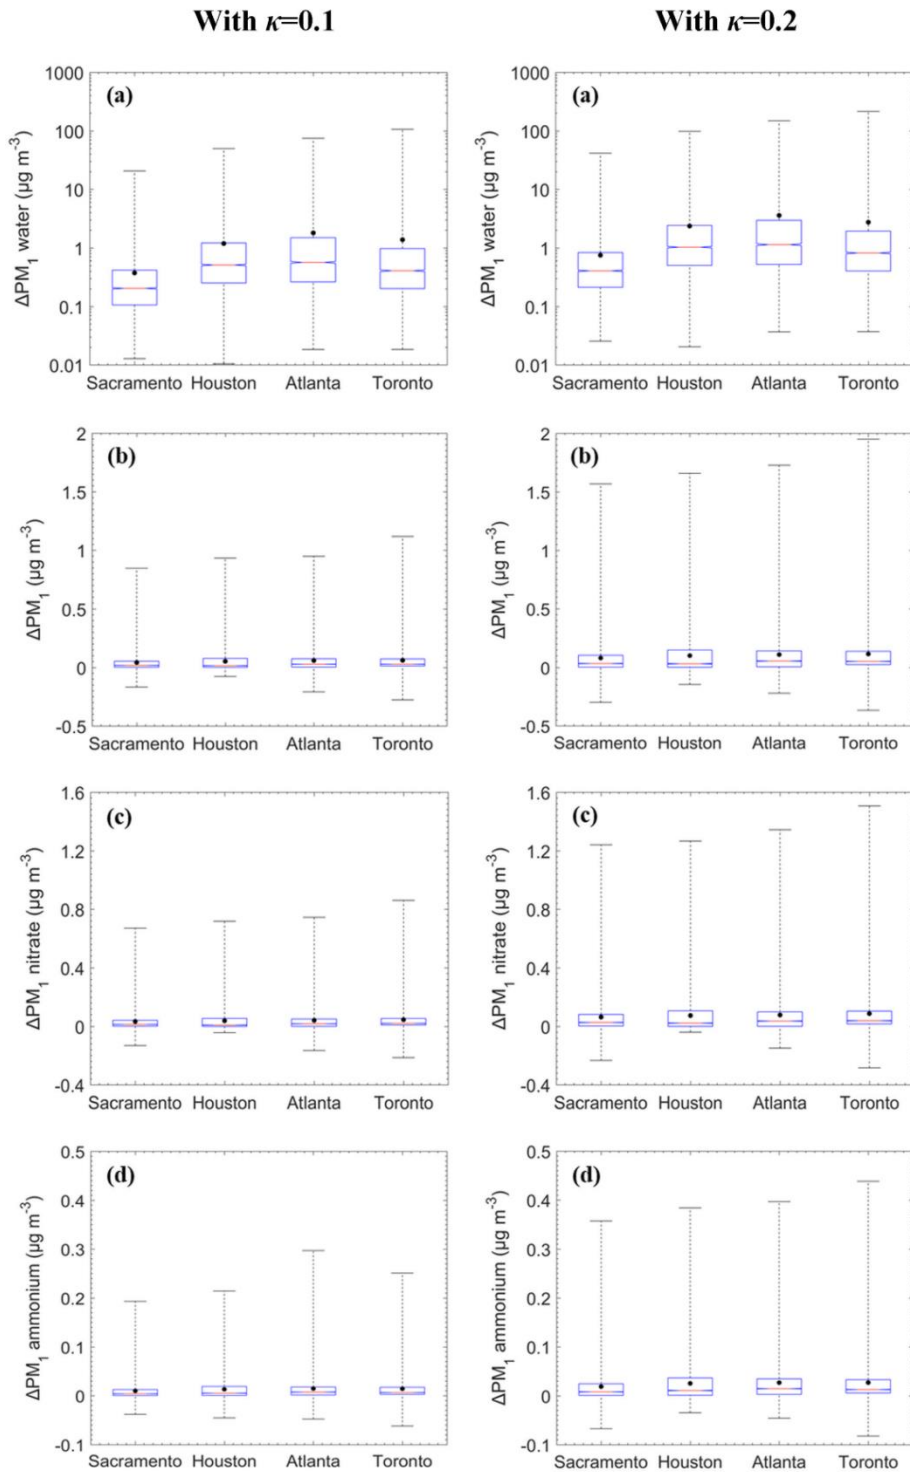

**Figure S5.** Box plots for concentration changes in the hourly  $PM_{10}$ : (a) water, (b) total dry, (c) nitrate, and (d) ammonium due to SOAW when  $\kappa=0.1$  and  $\kappa=0.2$  for Sacramento, California; Houston, Texas; Atlanta, Georgia; and Toronto, Canada during 2010. The red line represents the median, the black dot is the mean value, the upper box line is the upper quartile (75%) and the lower box line is the lower quartile (25%) of the distribution. A negative change corresponds to a decrease. Water is in log scale to show clearly both the relatively small average and the large range of high values.

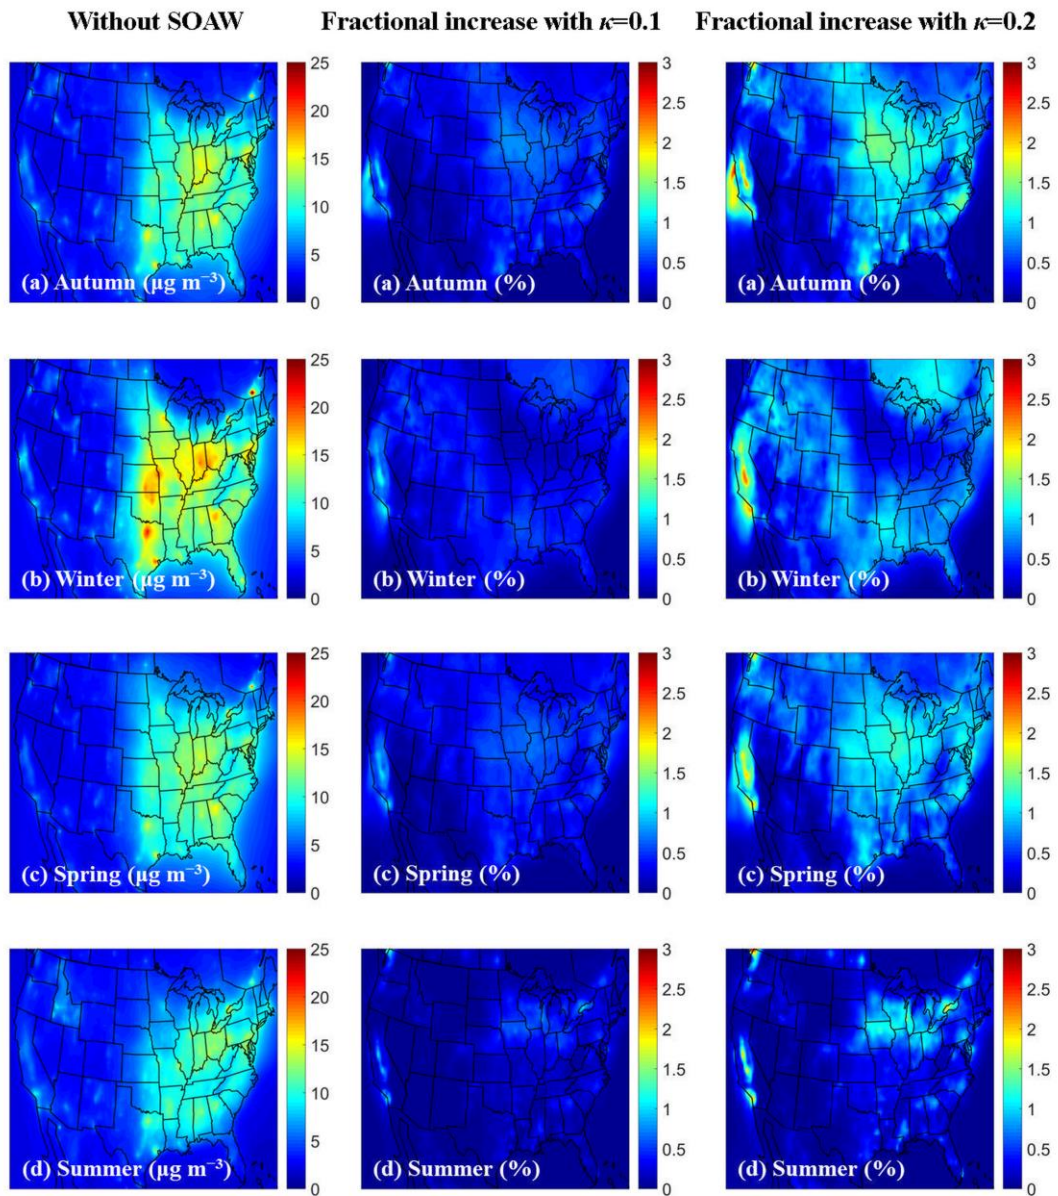

**Figure S6.** Average ground-level concentrations of total dry PM<sub>1</sub> neglecting SOAW (in  $\mu\text{g m}^{-3}$ ) and the fractional increase when SOAW is present in the simulations with  $\kappa=0.1$  and  $\kappa=0.2$  during: (a) autumn (SON), (b) winter (DJF), (c) spring (MAM), and (d) summer (JJA) of 2010.
